# Supplementary material for: Water-repelling behavior of the 1-D hematite nano-network
Source: Royal Society of Chemistry journal article supplement (doi:10.1039/d3sm00483j), 2023-01-01

## Water repelling behavior of 1-D hematite nano-network

Shyamapada Patra,<sup>1</sup> Sriparna Chatterjee,<sup>2,\*</sup> Pritam Das,<sup>1</sup> Shyamal Chatterjee,<sup>1,\*</sup>

<sup>1</sup>*School of Basic Sciences, Indian Institute of Technology Bhubaneswar, Jatni,*

*752050, India*

<sup>2</sup>*CSIR-Institute of Minerals and Materials Technology, Bhubaneswar 751013, India*

\*Email: sriparna@immt.res.in and shyamal@iitbbs.ac.in

### Supplementary data

Fig. S1, the as-grown pristine hematite nanorods have uniformly grown on substrate with a diameter of about  $15 \pm 5$  nm.

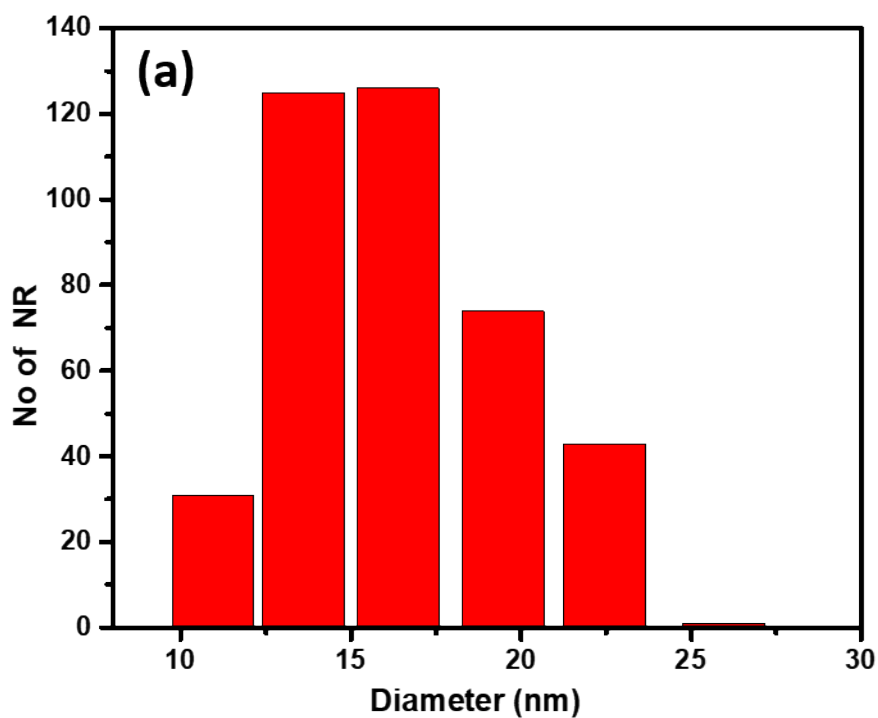

Fig. S2, the as-grown pristine hematite nanorods have uniformly grown on substrate with a length about  $75 \pm 10$  nm.

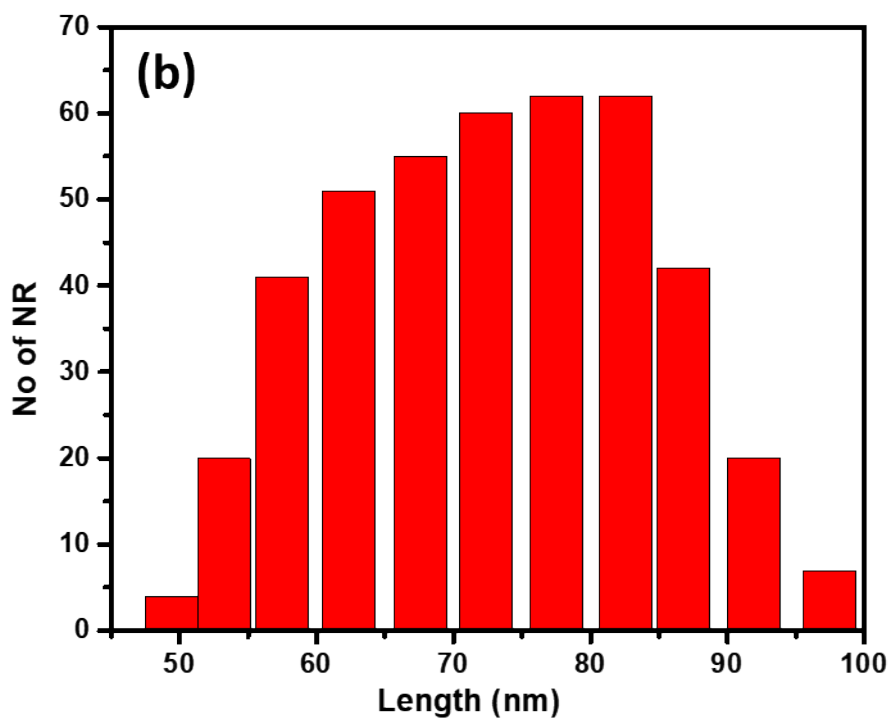

Fig. S3, the energy-dispersive X-ray spectra (EDX) confirm the presence of Fe and O in the pristine sample.

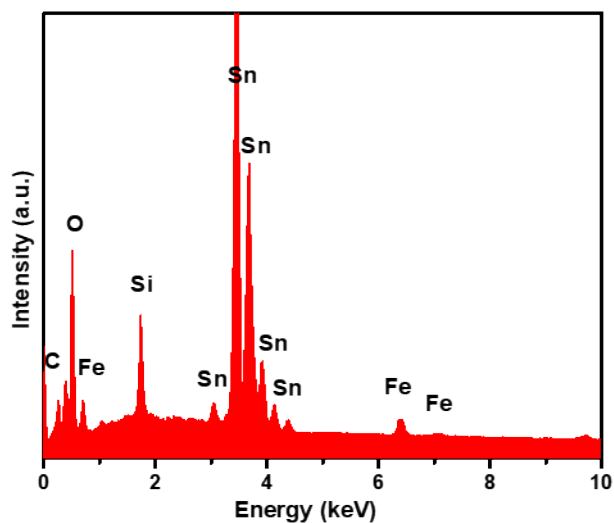

Fig .S4, the energy-dispersive X-ray spectra (EDX) confirm the presence of Fe and O in the irradiated sample at the ion fluence of  $5 \times 10^{16}$  ions.cm<sup>-2</sup>.

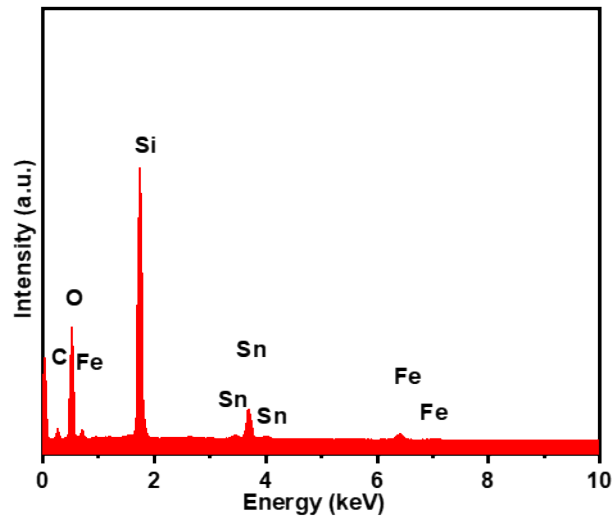

Fig .S5, the irradiated nano-network contains pores with sizes ranging from 10 to 100 nm at ion fluence of  $3 \times 10^{16}$  ions.cm<sup>-2</sup>.

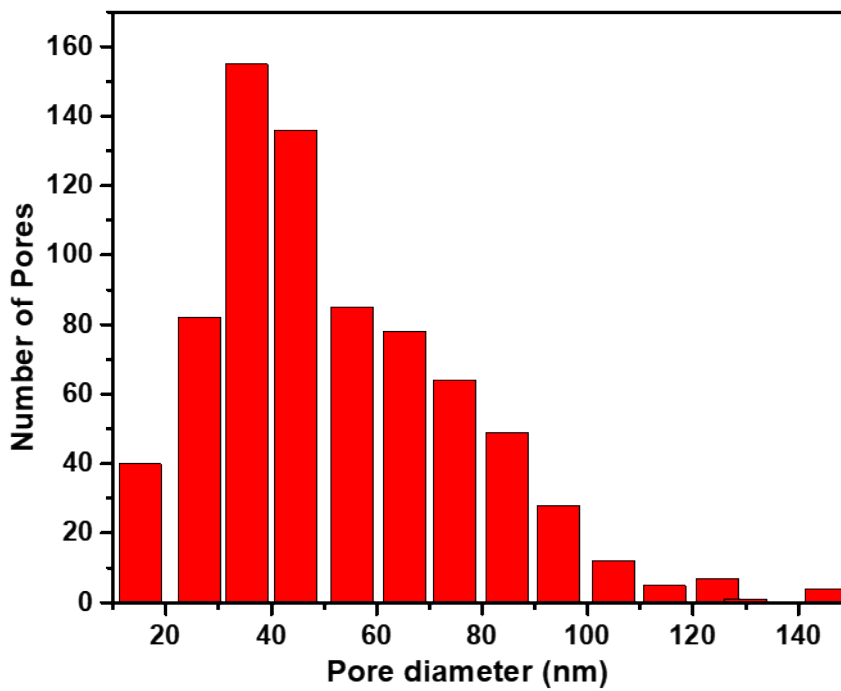

Fig .S6, I-V characteristic of the pristine sample (black) and 5 keV Ar<sup>+</sup> ions used at ion fluences of  $1 \times 10^{16}$  (blue),  $3 \times 10^{16}$  (red), and  $5 \times 10^{16}$  ions.cm<sup>-2</sup> (green). The calculated electrical conductivity for pristine samples is  $1.09 \text{ Sm}^{-1}$ . The samples were systematically irradiated with 5 KeV Ar<sup>+</sup> at fluences  $1 \times 10^{16}$ ,  $3 \times 10^{16}$ , and  $5 \times 10^{16}$  ions.cm<sup>-2</sup> and they yield current in the range  $-0.014$  to  $0.013 \text{ }\mu\text{A}$ ,  $-0.023$  to  $0.022 \text{ }\mu\text{A}$ , and  $-0.039$  to  $0.031 \text{ }\mu\text{A}$  in the same range of voltage and the corresponding conductivities are  $1.12 \text{ Sm}^{-1}$ ,  $2.12 \text{ Sm}^{-1}$ , and  $3.01 \text{ Sm}^{-1}$  respectively.

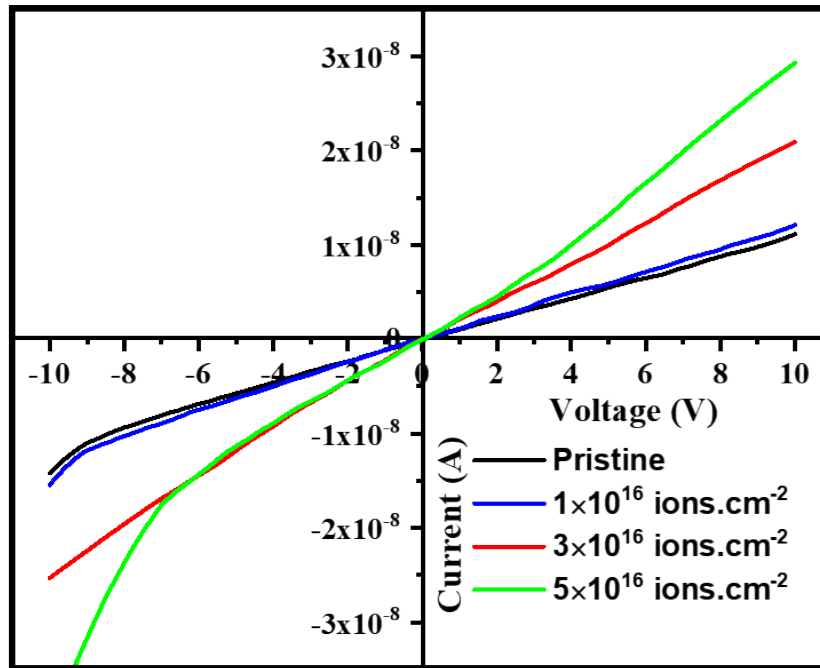

Supplement: d3sm00483j2.pdf [file d3sm00483j2.pdf]
